# Supplementary material for: Systolic Blood Pressure Response in SPRINT (Systolic Blood Pressure Intervention Trial) and ACCORD (Action to Control Cardiovascular Risk in Diabetes): A Possible Explanation for Discordant Trial Results
Source: PubMed Central journal article supplement — J Am Heart Assoc. 2017 Nov 13;6(11):e007509. doi: 10.1161/JAHA.117.007509 (PMC5721802; doi:10.1161/jaha.117.007509), 2017-11-13
Supplement: JAH3-6-e007509-s001.pdf [file JAH3-6-e007509-s001.pdf]

# **SUPPLEMENTAL MATERIAL**

**Table S1. Model selection.**

| <b>Model</b>     | <b>-2Log-likelihood</b> | <b>BIC*</b> | <b>Proportion in class (%)</b> |      |      |     |
|------------------|-------------------------|-------------|--------------------------------|------|------|-----|
|                  |                         |             | 1                              | 2    | 3    | 4   |
| <b>1 class</b>   | 485795                  | 486185      |                                |      |      |     |
| <b>2 classes</b> | 483155                  | 483622      | 61.6                           | 38.4 |      |     |
| <b>3 classes</b> | 482801                  | 483313      | 18.1                           | 73.3 | 8.6  |     |
| <b>4 classes</b> | 482731                  | 483288      | 3.4                            | 47.4 | 46.4 | 2.8 |

\* BIC denotes the Bayesian Information Criteria.

**Table S2. Participant characteristics by visit-to-visit variability of systolic blood pressure (SBP).\***

| Characteristic                                        | SPRINT                              |                       |                      |                      | ACCORD              |                       |                      |                      |
|-------------------------------------------------------|-------------------------------------|-----------------------|----------------------|----------------------|---------------------|-----------------------|----------------------|----------------------|
|                                                       | Class of visit-to-visit variability |                       |                      |                      |                     |                       |                      |                      |
|                                                       | 5.7 mmHg<br>(N=1642)                | 10.8 mmHg<br>(N=6449) | 17.9 mmHg<br>(N=936) | p value<br>for trend | 5.7 mmHg<br>(N=825) | 10.8 mmHg<br>(N=3519) | 17.9 mmHg<br>(N=231) | p value<br>for trend |
| Intensive group—no. (%)                               | 899 (54.8)                          | 3196 (49.6)           | 431 (46.0)           | <0.001               | 457 (55.4)          | 1688 (48.0)           | 142 (61.5)           | 0.248                |
| Baseline characteristics                              |                                     |                       |                      |                      |                     |                       |                      |                      |
| Age—yr                                                | 66.6±8.9                            | 67.9±9.3              | 69.4±10.0            | <0.001               | 61.9±7.1            | 62.8±6.5              | 64.0±6.9             | <0.001               |
| White—no. (%)                                         | 952 (58.0)                          | 3784 (58.7)           | 481 (51.4)           | 0.011                | 504 (61.1)          | 2068 (58.8)           | 112 (48.5)           | 0.005                |
| Female—no. (%)                                        | 428 (26.1)                          | 2331 (36.1)           | 453 (48.4)           | <0.001               | 347 (42.1)          | 1701 (48.3)           | 131 (56.7)           | <0.001               |
| Body-mass index—<br>kg/m <sup>2</sup>                 | 30.1±5.4                            | 29.9±5.8              | 29.4±6.2             | 0.006                | 31.6±5.6            | 32.3±5.4              | 32.3±5.7             | 0.006                |
| Framingham Risk<br>Score—%                            | 23.9±11.4                           | 24.6±12.4             | 26.6±13.9            | <0.001               | 33.3±16.1           | 35.0±16.7             | 40.0±18.7            | <0.001               |
| Estimated GFR—<br>ml/min/1.73 m <sup>2</sup>          | 74.3±18.9                           | 71.7±20.5             | 68.7±22.6            | <0.001               | 91.9±23.4           | 90.8±22.9             | 85.1±24.3            | 0.001                |
| Cholesterol—mg/dl                                     |                                     |                       |                      |                      |                     |                       |                      |                      |
| Total                                                 | 189.4±41.8                          | 190.2±40.4            | 191.7±44.1           | 0.185                | 187.5±40.7          | 192.3±42.2            | 198.4±41.6           | <0.001               |
| High-density lipoprotein                              | 51.2±13.4                           | 53.0±14.5             | 55.1±15.7            | <0.001               | 45.3±12.5           | 46.3±13.0             | 46.1±13.8            | 0.090                |
| Triglycerides—mg/dl                                   | 127.4±83.1                          | 126.2±94.1            | 120.3±75.1           | 0.088                | 185.3±130.1         | 183.7±128.6           | 181.9±124.2          | 0.690                |
| Glucose—mg/dl                                         | 99.4±12.5                           | 98.8±13.7             | 97.9±14.5            | 0.009                | 172.3±51.5          | 174.2±54.9            | 172.4±63.1           | 0.596                |
| Ratio of urinary albumin<br>(mg) to creatinine (g)    | 32.2±151.0                          | 40.2±165.1            | 58.4±179.8           | <0.001               | 52.4±174.8          | 84.3±246.0            | 170.6±411.8          | <0.001               |
| Aspirin use—no. (%)                                   | 821 (50.0)                          | 3317 (51.4)           | 160 (49.1)           | 0.995                | 420 (50.9)          | 1867 (53.1)           | 112 (48.5)           | 0.930                |
| Statin use—no. (%)                                    | 717 (43.7)                          | 2810 (43.6)           | 394 (42.1)           | 0.574                | 552 (66.9)          | 2287 (65.0)           | 145 (62.8)           | 0.168                |
| Antihypertensive<br>medication use—no. (%)            | 1461 (89.0)                         | 5849 (90.7)           | 861 (92.0)           | 0.008                | 711 (86.2)          | 3087 (87.7)           | 215 (93.1)           | 0.015                |
| Smoking—no. (%)                                       | 182 (11.1)                          | 845 (13.1)            | 158 (16.9)           | <0.001               | 90 (10.9)           | 410 (11.7)            | 28 (12.1)            | 0.512                |
| Cardiovascular<br>disease—no. (%)                     | 269 (16.4)                          | 1272 (19.7)           | 239 (25.5)           | <0.001               | 288 (34.9)          | 1125 (32.0)           | 94 (40.7)            | 0.910                |
| Blood pressure—mmHg                                   |                                     |                       |                      |                      |                     |                       |                      |                      |
| Systolic                                              | 136.3±10.6                          | 139.5±15.1            | 146.5±22.2           | <0.001               | 136.7±10.7          | 139.0±15.7            | 146.1±19.3           | <0.001               |
| Diastolic                                             | 77.9 (10.3)                         | 78.1 (11.7)           | 79.3 (15.0)          | 0.014                | 75.6 (8.9)          | 75.8 (10.1)           | 77.0 (11.1)          | 0.158                |
| Characteristics 0-1 year post-randomization           |                                     |                       |                      |                      |                     |                       |                      |                      |
| No. antihypertensive<br>medications                   | 2.0±1.0                             | 2.2±1.0               | 2.5±1.0              | <0.001               | 2.4±1.0             | 2.6±1.1               | 3.3±1.1              | <0.001               |
| No. changes in no.<br>antihypertensive<br>medications | 0.7±0.9                             | 1.2±1.1               | 1.8±1.3              | <0.001               | 1.3±1.3             | 1.7±1.3               | 2.4±1.4              | <0.001               |
| Visit adherence—no.<br>(%)†                           | 89.9                                | 82.9                  | 81.0                 | <0.001               | 81.2                | 77.2                  | 75.3                 | 0.010                |

\* Plus-minus values are means ±SD. GFR denotes glomerular filtration rate.

† Visit adherence was defined as not missing any visit during the first year post-randomization. SPRINT required the intensive and standard groups to have visits at 1, 3, 6, 9, and 12 months. ACCORD required the intensive group to have visits at 1, 2, 3, 4, 6, 8, 10, and 12 months and the standard group at 1, 4, 8, and 12 months.

**Table S3. Post 1-year outcomes associated with visit-to-visit variability classes.**

| Variable                         | Participants | Class of visit-to-visit variability |                  |                   | P value for trend | P value for trial heterogeneity of hazard ratio |
|----------------------------------|--------------|-------------------------------------|------------------|-------------------|-------------------|-------------------------------------------------|
|                                  |              | 5.7 mmHg                            | 10.8 mmHg        | 17.9 mmHg         |                   |                                                 |
| <b>SPRINT primary outcome</b>    |              |                                     |                  |                   |                   |                                                 |
| No. events (%)                   | SPRINT       | 53 (3.2)                            | 267 (4.1)        | 60 (6.4)          | <0.001            |                                                 |
|                                  | ACCORD       | 39 (4.7)                            | 365 (10.4)       | 37 (16.0)         | <0.001            |                                                 |
| Unadjusted Hazard Ratio (95% CI) | All*         | 1.00                                | 1.75 (1.41-2.18) | 2.83 (2.12-3.77)  | <0.001            | 0.032                                           |
|                                  | SPRINT†      | 1.00                                | 1.32 (0.99-1.78) | 2.09 (1.44-3.02)  | <0.001            |                                                 |
|                                  | ACCORD†      | 1.00                                | 2.33 (1.68-3.25) | 4.06 (2.59-6.37)  | <0.001            |                                                 |
| Adjusted Hazard Ratio (95% CI)‡  | All*         | 1.00                                | 1.54 (1.24-1.92) | 2.05 (1.53-2.76)  | <0.001            | 0.019                                           |
|                                  | SPRINT†      | 1.00                                | 1.13 (0.84-1.51) | 1.51 (1.03-2.19)  | 0.034             |                                                 |
|                                  | ACCORD†      | 1.00                                | 2.11 (1.51-2.94) | 2.90 (1.83-4.59)  | <0.001            |                                                 |
| <b>ACCORD primary outcome</b>    |              |                                     |                  |                   |                   |                                                 |
| No. events (%)                   | SPRINT       | 37 (2.3)                            | 185 (2.9)        | 44 (4.7)          | 0.001             |                                                 |
|                                  | ACCORD       | 31 (3.8)                            | 296 (8.4)        | 25 (10.8)         | <0.001            |                                                 |
| Unadjusted Hazard Ratio (95% CI) | All*         | 1.00                                | 1.79 (1.39-2.31) | 2.76 (1.97-3.87)  | <0.001            | 0.072                                           |
|                                  | SPRINT†      | 1.00                                | 1.31 (0.92-1.86) | 2.18 (1.41-3.38)  | <0.001            |                                                 |
|                                  | ACCORD†      | 1.00                                | 2.37 (1.64-3.43) | 3.36 (1.99-5.70)  | <0.001            |                                                 |
| Adjusted Hazard Ratio (95% CI)‡  | All*         | 1.00                                | 1.61 (1.24-2.08) | 2.04 (1.44-2.88)  | <0.001            | 0.033                                           |
|                                  | SPRINT†      | 1.00                                | 1.12 (0.79-1.60) | 1.59 (1.02-2.48)  | 0.042             |                                                 |
|                                  | ACCORD†      | 1.00                                | 2.19 (1.51-3.18) | 2.45 (1.43-4.20)  | <0.001            |                                                 |
| <b>Heart failure</b>             |              |                                     |                  |                   |                   |                                                 |
| No. events (%)                   | SPRINT       | 12 (0.7)                            | 76 (1.2)         | 24 (2.6)          | <0.001            |                                                 |
|                                  | ACCORD       | 14 (1.7)                            | 108 (3.1)        | 17 (7.4)          | <0.001            |                                                 |
| Unadjusted Hazard Ratio (95% CI) | All*         | 1.00                                | 1.79 (1.18-2.69) | 4.28 (2.61-7.01)  | <0.001            | 0.785                                           |
|                                  | SPRINT†      | 1.00                                | 1.67 (0.91-3.07) | 3.68 (1.84-7.36)  | <0.001            |                                                 |
|                                  | ACCORD†      | 1.00                                | 1.88 (1.08-3.29) | 5.09 (2.51-10.34) | <0.001            |                                                 |
| Adjusted Hazard Ratio (95% CI)‡  | All*         | 1.00                                | 1.40 (0.93-2.12) | 2.50 (1.50-4.16)  | <0.001            | 0.859                                           |
|                                  | SPRINT†      | 1.00                                | 1.29 (0.70-2.38) | 2.19 (1.08-4.42)  | 0.019             |                                                 |
|                                  | ACCORD†      | 1.00                                | 1.50 (0.85-2.63) | 2.89 (1.40-5.97)  | 0.005             |                                                 |
| <b>Stroke</b>                    |              |                                     |                  |                   |                   |                                                 |
| No. events (%)                   | SPRINT       | 12 (0.7)                            | 62 (1.0)         | 15 (1.6)          | 0.045             |                                                 |
|                                  | ACCORD       | 8 (1.0)                             | 61 (1.7)         | 10 (4.3)          | 0.003             |                                                 |
| Unadjusted Hazard Ratio (95% CI) | All*         | 1.00                                | 1.56 (0.97-2.50) | 3.13 (1.73-5.66)  | <0.001            | 0.391                                           |
|                                  | SPRINT†      | 1.00                                | 1.36 (0.73-2.51) | 2.29 (1.07-4.89)  | 0.035             |                                                 |
|                                  | ACCORD†      | 1.00                                | 1.86 (0.89-3.89) | 5.14 (2.03-13.03) | 0.001             |                                                 |
| Adjusted Hazard Ratio (95% CI)‡  | All*         | 1.00                                | 1.30 (0.81-2.10) | 2.05 (1.11-3.79)  | 0.024             | 0.413                                           |
|                                  | SPRINT†      | 1.00                                | 1.13 (0.60-2.10) | 1.50 (0.69-3.27)  | 0.303             |                                                 |
|                                  | ACCORD†      | 1.00                                | 1.57 (0.75-3.29) | 3.35 (1.29-8.69)  | 0.017             |                                                 |
| <b>All-cause death</b>           |              |                                     |                  |                   |                   |                                                 |
| No. events (%)                   | SPRINT       | 25 (1.5)                            | 199 (3.1)        | 51 (5.4)          | <0.001            |                                                 |
|                                  | ACCORD       | 34 (4.1)                            | 189 (5.4)        | 14 (6.1)          | 0.120             |                                                 |
| Unadjusted Hazard Ratio (95% CI) | All*         | 1.00                                | 1.66 (1.26-2.18) | 2.69 (1.89-3.84)  | <0.001            | 0.116                                           |
|                                  | SPRINT†      | 1.00                                | 2.09 (1.38-3.17) | 3.71 (2.30-5.99)  | <0.001            |                                                 |
|                                  | ACCORD†      | 1.00                                | 1.34 (0.93-1.94) | 1.64 (0.88-3.06)  | 0.067             |                                                 |
| Adjusted Hazard Ratio (95% CI)‡  | All*         | 1.00                                | 1.40 (1.06-1.84) | 1.86 (1.29-2.68)  | <0.001            | 0.159                                           |
|                                  | SPRINT†      | 1.00                                | 1.70 (1.12-2.59) | 2.50 (1.53-4.07)  | <0.001            |                                                 |
|                                  | ACCORD†      | 1.00                                | 1.17 (0.81-1.69) | 1.16 (0.61-2.18)  | 0.486             |                                                 |

CI denotes confidence interval.

\*Modeling of the pooled participants from SPRINT and ACCORD, with stratified baseline hazard functions by trial.

†Modeling separately of the participants from SPRINT or ACCORD.

‡Adjusted for age, race, sex, Framingham Risk Score, baseline systolic and diastolic blood pressure, use of antihypertensive medication before randomization, smoking status, aspirin use, estimated glomerular filtration rate, history of clinical/subclinical cardiovascular disease, total cholesterol, high-density lipoprotein, triglycerides, glucose, urine albumin/creatinine ratio, body-mass index, statin use, treatment assignment, number of antihypertensive medications used, visit adherence, and estimated achieved 1-year systolic blood pressure.

**Table S4. Post 1-year outcomes associated with estimated systolic blood pressure (SBP) achieved at 1 year, for participants without missing SBP measurements during the first year.**

| Variable                         | Participants | Tertile of estimated achieved SBP |                  |                  | P value for trend | P value for trial heterogeneity of hazard ratios |
|----------------------------------|--------------|-----------------------------------|------------------|------------------|-------------------|--------------------------------------------------|
|                                  |              | <122 mmHg                         | 122-134 mmHg     | >134 mmHg        |                   |                                                  |
| <b>SPRINT primary outcome</b>    |              |                                   |                  |                  |                   |                                                  |
| No. events (%)                   | SPRINT       | 81 (3.1)                          | 108 (4.6)        | 122 (4.7)        | 0.005             |                                                  |
|                                  | ACCORD       | 74 (6.7)                          | 131 (9.7)        | 132 (12.0)       | <0.001            |                                                  |
| Unadjusted Hazard Ratio (95% CI) | All*         | 1.00                              | 1.45 (1.19-1.78) | 1.61 (1.32-1.96) | <0.001            | 0.681                                            |
|                                  | SPRINT†      | 1.00                              | 1.52 (1.14-2.02) | 1.54 (1.16-2.04) | 0.003             |                                                  |
|                                  | ACCORD†      | 1.00                              | 1.41 (1.06-1.88) | 1.68 (1.26-2.23) | <0.001            |                                                  |
| Adjusted Hazard Ratio (95% CI)‡  | All*         | 1.00                              | 1.32 (1.07-1.63) | 1.53 (1.23-1.90) | <0.001            | 0.966                                            |
|                                  | SPRINT†      | 1.00                              | 1.34 (1.00-1.79) | 1.50 (1.12-2.01) | 0.007             |                                                  |
|                                  | ACCORD†      | 1.00                              | 1.31 (0.98-1.76) | 1.55 (1.15-2.10) | 0.004             |                                                  |
| <b>ACCORD primary outcome</b>    |              |                                   |                  |                  |                   |                                                  |
| No. events (%)                   | SPRINT       | 55 (2.1)                          | 77 (3.3)         | 85 (3.3)         | 0.014             |                                                  |
|                                  | ACCORD       | 64 (5.8)                          | 102 (7.6)        | 103 (9.4)        | 0.001             |                                                  |
| Unadjusted Hazard Ratio (95% CI) | All*         | 1.00                              | 1.39 (1.10-1.75) | 1.52 (1.21-1.92) | <0.001            | 0.552                                            |
|                                  | SPRINT†      | 1.00                              | 1.59 (1.12-2.24) | 1.57 (1.12-2.21) | 0.011             |                                                  |
|                                  | ACCORD†      | 1.00                              | 1.29 (0.94-1.77) | 1.45 (1.06-1.98) | 0.015             |                                                  |
| Adjusted Hazard Ratio (95% CI)‡  | All*         | 1.00                              | 1.26 (0.99-1.60) | 1.42 (1.10-1.82) | 0.007             | 0.725                                            |
|                                  | SPRINT†      | 1.00                              | 1.40 (0.99-1.99) | 1.51 (1.06-2.15) | 0.025             |                                                  |
|                                  | ACCORD†      | 1.00                              | 1.16 (0.84-1.59) | 1.34 (0.96-1.86) | 0.085             |                                                  |
| <b>Heart failure</b>             |              |                                   |                  |                  |                   |                                                  |
| No. events (%)                   | SPRINT       | 18 (0.7)                          | 35 (1.5)         | 39 (1.5)         | 0.014             |                                                  |
|                                  | ACCORD       | 20 (1.8)                          | 39 (2.9)         | 44 (4.0)         | 0.001             |                                                  |
| Unadjusted Hazard Ratio (95% CI) | All*         | 1.00                              | 1.84 (1.24-2.73) | 2.16 (1.47-3.18) | <0.001            | 0.572                                            |
|                                  | SPRINT†      | 1.00                              | 2.22 (1.26-3.92) | 2.23 (1.28-3.90) | 0.007             |                                                  |
|                                  | ACCORD†      | 1.00                              | 1.56 (0.91-2.68) | 2.09 (1.23-3.56) | 0.006             |                                                  |
| Adjusted Hazard Ratio (95% CI)‡  | All*         | 1.00                              | 1.62 (1.08-2.43) | 2.10 (1.39-3.17) | <0.001            | 0.812                                            |
|                                  | SPRINT†      | 1.00                              | 1.86 (1.04-3.31) | 2.29 (1.28-4.08) | 0.006             |                                                  |
|                                  | ACCORD†      | 1.00                              | 1.43 (0.83-2.48) | 1.92 (1.10-3.36) | 0.020             |                                                  |
| <b>Stroke</b>                    |              |                                   |                  |                  |                   |                                                  |
| No. events (%)                   | SPRINT       | 18 (0.7)                          | 29 (1.2)         | 25 (1.0)         | 0.324             |                                                  |
|                                  | ACCORD       | 8 (0.7)                           | 25 (1.9)         | 28 (2.5)         | <0.001            |                                                  |
| Unadjusted Hazard Ratio (95% CI) | All*         | 1.00                              | 1.98 (1.24-3.17) | 1.97 (1.23-3.15) | 0.007             | 0.208                                            |
|                                  | SPRINT†      | 1.00                              | 1.82 (1.01-3.28) | 1.41 (0.77-2.59) | 0.294             |                                                  |
|                                  | ACCORD†      | 1.00                              | 2.43 (1.10-5.40) | 3.17 (1.44-6.97) | 0.004             |                                                  |
| Adjusted Hazard Ratio (95% CI)‡  | All*         | 1.00                              | 1.82 (1.13-2.96) | 1.80 (1.09-2.98) | 0.033             | 0.334                                            |
|                                  | SPRINT†      | 1.00                              | 1.61 (0.88-2.93) | 1.34 (0.71-2.52) | 0.414             |                                                  |
|                                  | ACCORD†      | 1.00                              | 2.34 (1.04-5.24) | 2.79 (1.24-6.30) | 0.017             |                                                  |
| <b>All-cause death</b>           |              |                                   |                  |                  |                   |                                                  |
| No. events (%)                   | SPRINT       | 43 (1.7)                          | 84 (3.6)         | 80 (3.1)         | 0.002             |                                                  |
|                                  | ACCORD       | 43 (3.9)                          | 58 (4.3)         | 53 (4.8)         | 0.278             |                                                  |
| Unadjusted Hazard Ratio (95% CI) | All*         | 1.00                              | 1.58 (1.21-2.07) | 1.49 (1.13-1.96) | 0.006             | 0.017                                            |
|                                  | SPRINT†      | 1.00                              | 2.22 (1.54-3.20) | 1.91 (1.32-2.77) | 0.001             |                                                  |
|                                  | ACCORD†      | 1.00                              | 1.02 (0.69-1.52) | 1.07 (0.71-1.60) | 0.756             |                                                  |
| Adjusted Hazard Ratio (95% CI)‡  | All*         | 1.00                              | 1.38 (1.05-1.82) | 1.33 (1.00-1.78) | 0.078             | 0.028                                            |
|                                  | SPRINT†      | 1.00                              | 1.88 (1.29-2.73) | 1.75 (1.19-2.57) | 0.009             |                                                  |
|                                  | ACCORD†      | 1.00                              | 0.93 (0.62-1.39) | 0.92 (0.60-1.42) | 0.727             |                                                  |

CI denotes confidence interval.

\*Modeling of the pooled participants from SPRINT and ACCORD, with stratified baseline hazard functions by trial.

†Modeling separately of the participants from SPRINT or ACCORD.

‡Adjusted for age, race, sex, Framingham risk score, baseline systolic and diastolic blood pressure, use of antihypertensive medication before randomization, smoking status, aspirin use, estimated glomerular filtration rate, history of clinical/subclinical cardiovascular disease, total cholesterol, high-density lipoprotein, triglycerides, glucose, urine albumin/creatinine ratio, body-mass index, statin use, number of antihypertensive medications used and visit-to-visit variability class.

**Table S5. Post 1-year outcomes associated with visit-to-visit variability, for participants without missing SBP measurements during the first year.**

| Variable                         | Participants | Class of visit-to-visit variability |                   |                    | P value for trend | P value for trial heterogeneity of hazard ratios |
|----------------------------------|--------------|-------------------------------------|-------------------|--------------------|-------------------|--------------------------------------------------|
|                                  |              | 5.3 mmHg                            | 10.3mmHg          | 17.0 mmHg          |                   |                                                  |
| <b>SPRINT primary outcome</b>    |              |                                     |                   |                    |                   |                                                  |
| No. events (%)                   | SPRINT       | 40 (3.3)                            | 208 (3.8)         | 63 (6.6)           | <0.001            |                                                  |
|                                  | ACCORD       | 18 (3.4)                            | 273 (9.9)         | 46 (16.1)          | <0.001            |                                                  |
| Unadjusted Hazard Ratio (95% CI) | All*         | 1.00                                | 1.75 (1.33-2.30)  | 3.00 (2.18-4.12)   | <0.001            | 0.006                                            |
|                                  | SPRINT†      | 1.00                                | 1.17 (0.83-1.64)  | 2.03 (1.37-3.02)   | <0.001            |                                                  |
|                                  | ACCORD‡      | 1.00                                | 3.02 (1.88-4.87)  | 5.23 (3.03-9.02)   | <0.001            |                                                  |
| Adjusted Hazard Ratio (95% CI)‡  | All*         | 1.00                                | 1.53 (1.16-2.01)  | 2.13 (1.53-2.96)   | <0.001            | 0.002                                            |
|                                  | SPRINT†      | 1.00                                | 0.97 (0.69-1.37)  | 1.38 (0.92-2.07)   | 0.072             |                                                  |
|                                  | ACCORD‡      | 1.00                                | 2.76 (1.71-4.46)  | 3.86 (2.22-6.72)   | <0.001            |                                                  |
| <b>ACCORD primary outcome</b>    |              |                                     |                   |                    |                   |                                                  |
| No. events (%)                   | SPRINT       | 26 (2.2)                            | 147 (2.7)         | 44 (4.6)           | 0.001             |                                                  |
|                                  | ACCORD       | 16 (3.0)                            | 222 (8.1)         | 31 (10.9)          | <0.001            |                                                  |
| Unadjusted Hazard Ratio (95% CI) | All*         | 1.00                                | 1.84 (1.33-2.53)  | 2.84 (1.95-4.14)   | <0.001            | 0.064                                            |
|                                  | SPRINT†      | 1.00                                | 1.27 (0.84-1.93)  | 2.17 (1.34-3.53)   | 0.001             |                                                  |
|                                  | ACCORD‡      | 1.00                                | 2.74 (1.65-4.55)  | 3.84 (2.10-7.03)   | <0.001            |                                                  |
| Adjusted Hazard Ratio (95% CI)‡  | All*         | 1.00                                | 1.64 (1.19-2.26)  | 2.06 (1.39-3.04)   | <0.001            | 0.032                                            |
|                                  | SPRINT†      | 1.00                                | 1.08 (0.71-1.64)  | 1.52 (0.92-2.48)   | 0.068             |                                                  |
|                                  | ACCORD‡      | 1.00                                | 2.55 (1.53-4.24)  | 2.86 (1.55-5.28)   | <0.001            |                                                  |
| <b>Heart failure</b>             |              |                                     |                   |                    |                   |                                                  |
| No. events (%)                   | SPRINT       | 10 (0.8)                            | 58 (1.1)          | 24 (2.5)           | <0.001            |                                                  |
|                                  | ACCORD       | 4 (0.8)                             | 78 (2.8)          | 21 (7.4)           | <0.001            |                                                  |
| Unadjusted Hazard Ratio (95% CI) | All*         | 1.00                                | 2.03 (1.17-3.51)  | 5.06 (2.78-9.23)   | <0.001            | 0.178                                            |
|                                  | SPRINT†      | 1.00                                | 1.31 (0.67-2.56)  | 3.08 (1.48-6.45)   | <0.001            |                                                  |
|                                  | ACCORD‡      | 1.00                                | 3.82 (1.40-10.42) | 10.36 (3.56-30.18) | <0.001            |                                                  |
| Adjusted Hazard Ratio (95% CI)‡  | All*         | 1.00                                | 1.40 (0.93-2.12)  | 2.50 (1.50-4.16)   | <0.001            | 0.153                                            |
|                                  | SPRINT†      | 1.00                                | 1.01 (0.51-1.98)  | 1.73 (0.82-3.66)   | 0.070             |                                                  |
|                                  | ACCORD‡      | 1.00                                | 3.08 (1.13-8.45)  | 6.19 (2.09-18.31)  | <0.001            |                                                  |
| <b>Stroke</b>                    |              |                                     |                   |                    |                   |                                                  |
| No. events (%)                   | SPRINT       | 10 (0.8)                            | 47 (0.9)          | 15 (1.6)           | 0.103             |                                                  |
|                                  | ACCORD       | 6 (1.1)                             | 43 (1.6)          | 12 (4.2)           | 0.006             |                                                  |
| Unadjusted Hazard Ratio (95% CI) | All*         | 1.00                                | 1.18 (0.69-2.01)  | 2.57 (1.38-4.77)   | 0.002             | 0.484                                            |
|                                  | SPRINT†      | 1.00                                | 1.06 (0.53-2.09)  | 1.92 (0.86-4.28)   | 0.095             |                                                  |
|                                  | ACCORD‡      | 1.00                                | 1.40 (0.59-3.28)  | 3.93 (1.47-10.46)  | 0.004             |                                                  |
| Adjusted Hazard Ratio (95% CI)‡  | All*         | 1.00                                | 1.03 (0.60-1.76)  | 1.78 (0.93-3.39)   | 0.057             | 0.399                                            |
|                                  | SPRINT†      | 1.00                                | 0.90 (0.45-1.79)  | 1.28 (0.56-2.90)   | 0.493             |                                                  |
|                                  | ACCORD‡      | 1.00                                | 1.26 (0.53-2.97)  | 2.92 (1.07-7.97)   | 0.025             |                                                  |
| <b>All-cause death</b>           |              |                                     |                   |                    |                   |                                                  |
| No. events (%)                   | SPRINT       | 16 (1.3)                            | 148 (2.7)         | 43 (4.5)           | <0.001            |                                                  |
|                                  | ACCORD       | 16 (3.0)                            | 121 (4.4)         | 17 (6.0)           | 0.045             |                                                  |
| Unadjusted Hazard Ratio (95% CI) | All*         | 1.00                                | 1.78 (1.23-2.57)  | 2.78 (1.81-4.27)   | <0.001            | 0.517                                            |
|                                  | SPRINT†      | 1.00                                | 2.08 (1.24-3.49)  | 3.42 (1.93-6.08)   | <0.001            |                                                  |
|                                  | ACCORD‡      | 1.00                                | 1.34 (0.93-1.94)  | 1.64 (0.88-3.06)   | 0.067             |                                                  |
| Adjusted Hazard Ratio (95% CI)‡  | All†*        | 1.00                                | 1.56 (1.08-2.25)  | 2.01 (1.29-3.13)   | 0.002             | 0.633                                            |
|                                  | SPRINT†      | 1.00                                | 1.78 (1.06-2.99)  | 2.40 (1.34-4.31)   | 0.003             |                                                  |
|                                  | ACCORD‡      | 1.00                                | 1.33 (0.79-2.25)  | 1.55 (0.77-3.12)   | 0.205             |                                                  |

CI denotes confidence interval.

\*Modeling of the pooled participants from SPRINT and ACCORD, with stratified baseline hazard functions by trial.

†Modeling separately of the participants from SPRINT or ACCORD.

‡Adjusted for age, race, sex, Framingham Risk Score, baseline systolic and diastolic blood pressure, use of antihypertensive medication before randomization, smoking status, aspirin use, estimated glomerular filtration rate, history of clinical/subclinical cardiovascular disease, total cholesterol, high-density lipoprotein, triglycerides, glucose, urine albumin/creatinine ratio, body-mass index, statin use, treatment assignment, number of antihypertensive medications used, and estimated achieved 1-year SBP.

Figure S1. Hazard ratios of post 1-year outcomes associated with estimated SBP achieved at 1 year for SPRINT and ACCORD, using restricted cubic splines.

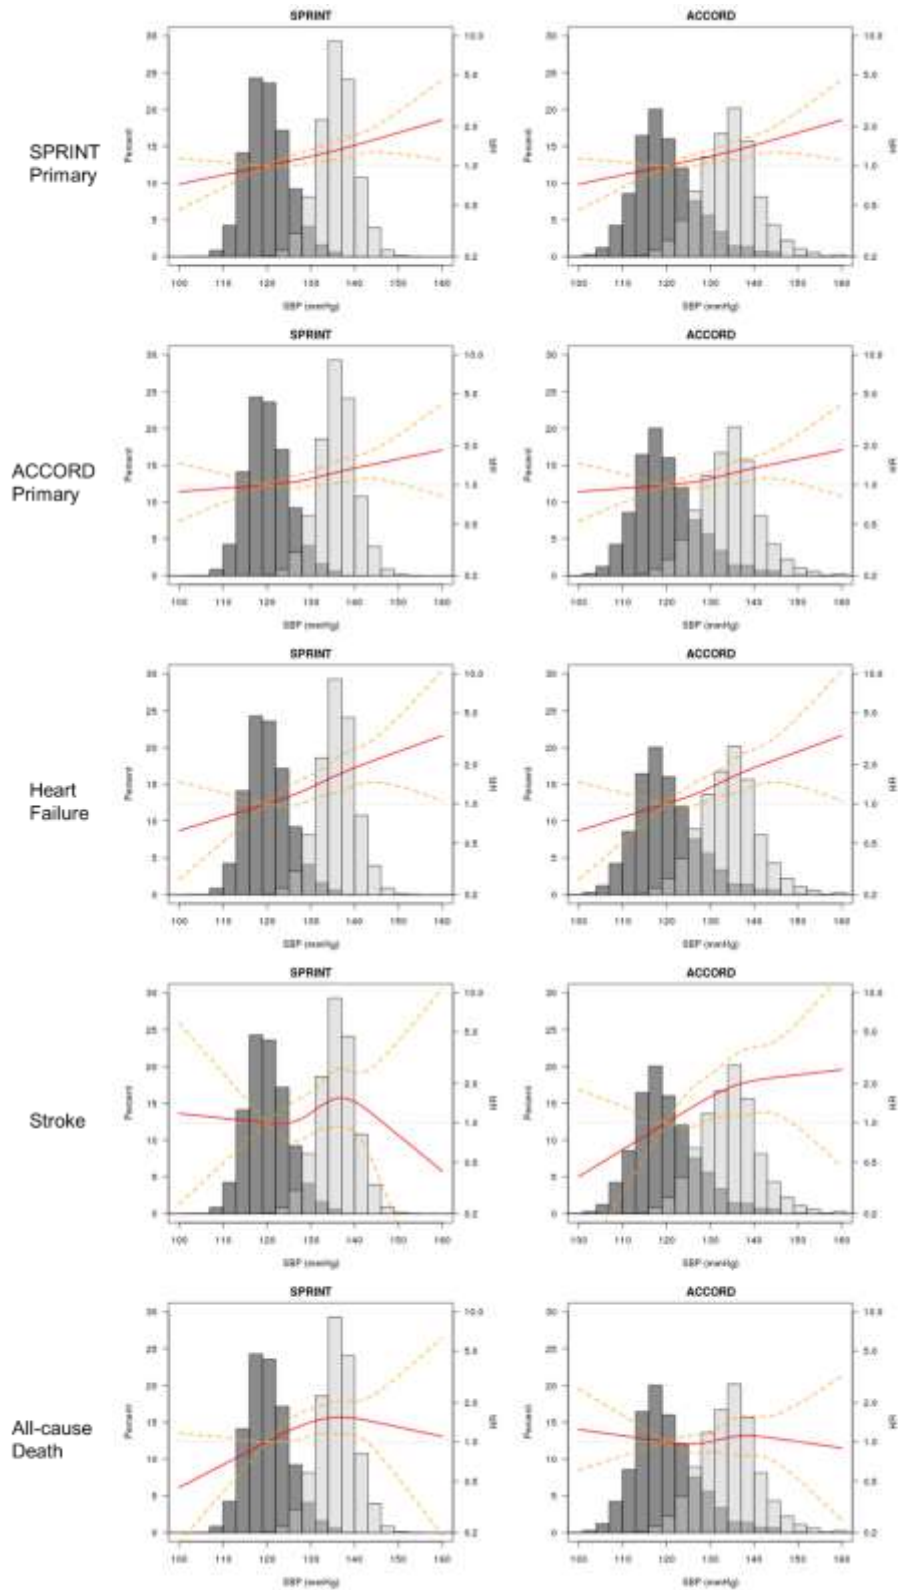

**Figure S2. Distribution of visit-to-visit variability classes for participants from the intensive and standard treatment groups of SPRINT and ACCORD. \**

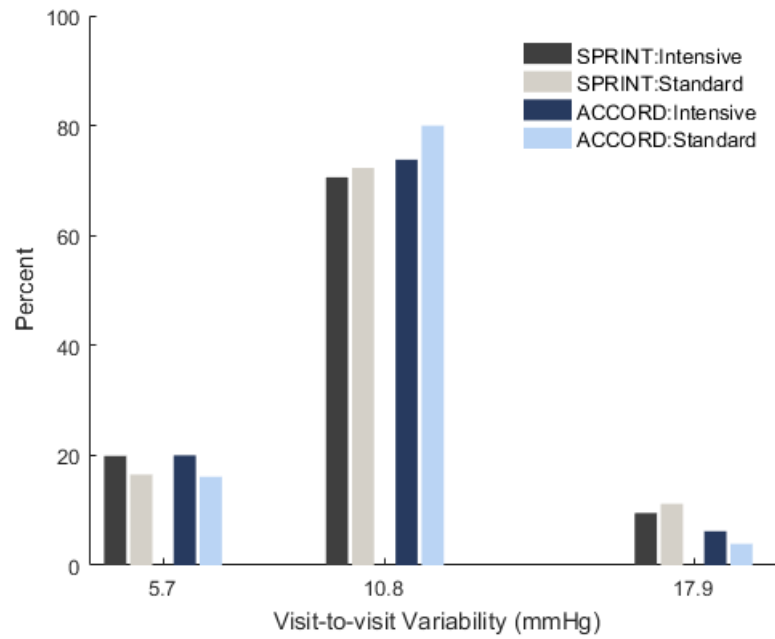

Bars represent percentages of participants assigned to 3 classes of visit-to-visit variability.



**Figure S3. Hazard ratios of post 1-year outcomes associated with intensive versus standard treatment for classes of visit-to-visit variability in (A) SPRINT and (B) ACCORD.\***

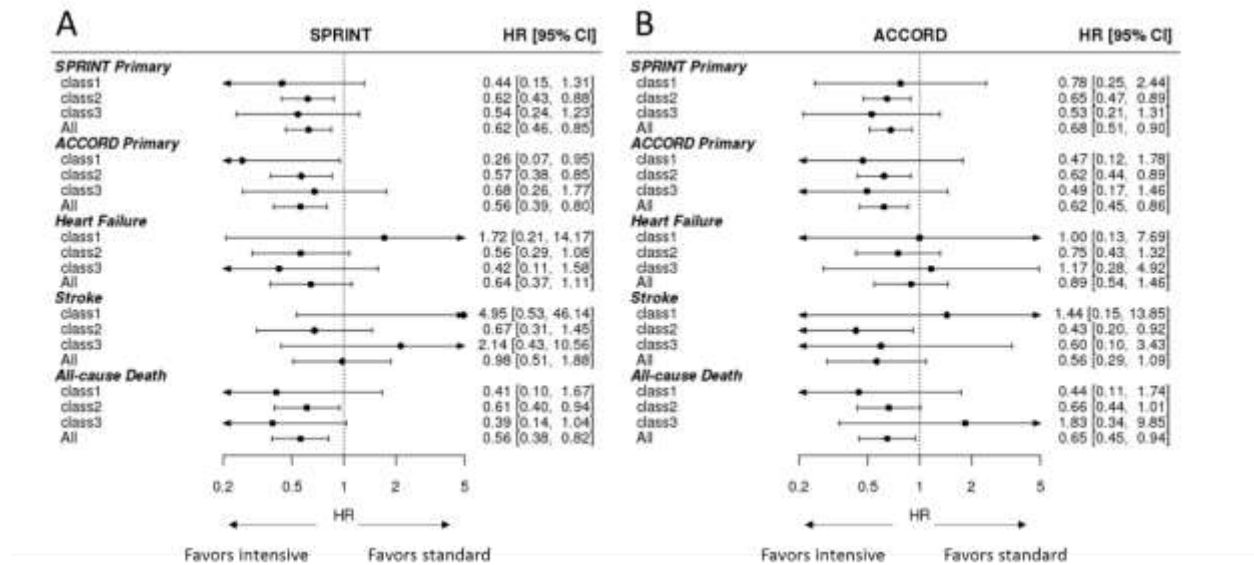

\* HR denotes the hazard ratio and CI the confidence interval.

Hazard ratios were adjusted for age, race, sex, Framingham Risk Score, baseline systolic and diastolic blood pressure, use of antihypertensive medication before randomization, smoking status, aspirin use, estimated glomerular filtration rate, history of clinical/subclinical cardiovascular disease, total cholesterol, high-density lipoprotein, triglycerides, glucose, urine albumin/creatinine ratio, body-mass index, statin use, number of antihypertensive medications used, visit adherence, and estimated achieved 1-year SBP. All interactions were not significant for visit-to-visit variability class and each outcome except for heart failure in SPRINT (class 2 vs class 1 [p=0.062], and class 3 vs class 1 [p=0.088]).
